# Supplementary material for: A cost-utility analysis of cervical cancer screening and human papillomavirus vaccination in the Philippines
Source: Springer Nature journal article supplement (doi:10.1186/s12889-015-2046-1), 2015-07-29

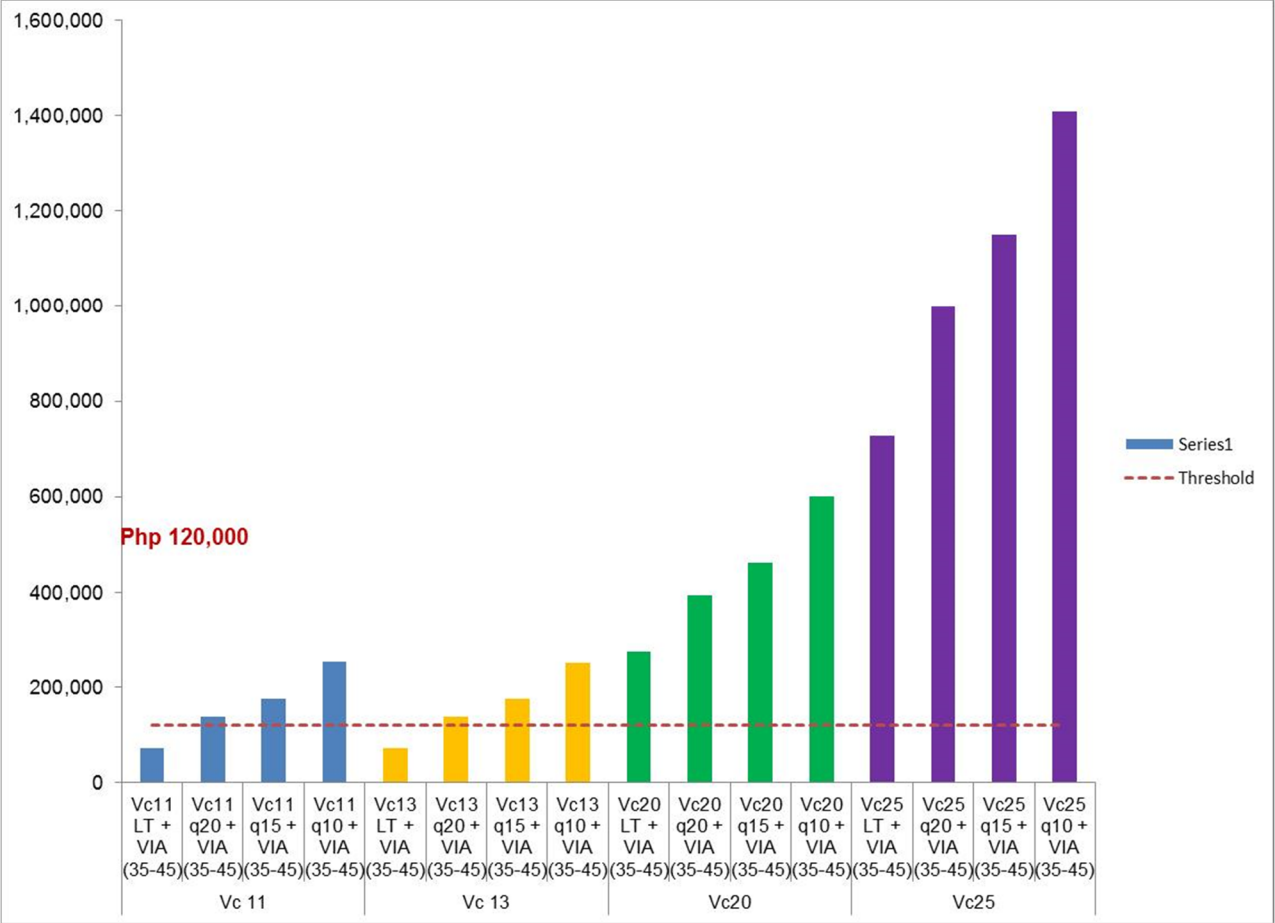

Supplement: MOESM3 [file 9749916]
